# Supplementary material for: Kir4.2 Potassium Channels in Retinal Pigment Epithelial Cells In Vitro: Contribution to Cell Viability and Proliferation, and Down-Regulation by Vascular Endothelial Growth Factor
Source: MDPI journal article supplement (doi:10.3390/biom12060848), 2022-06-18
Supplement: s1 [file s1]

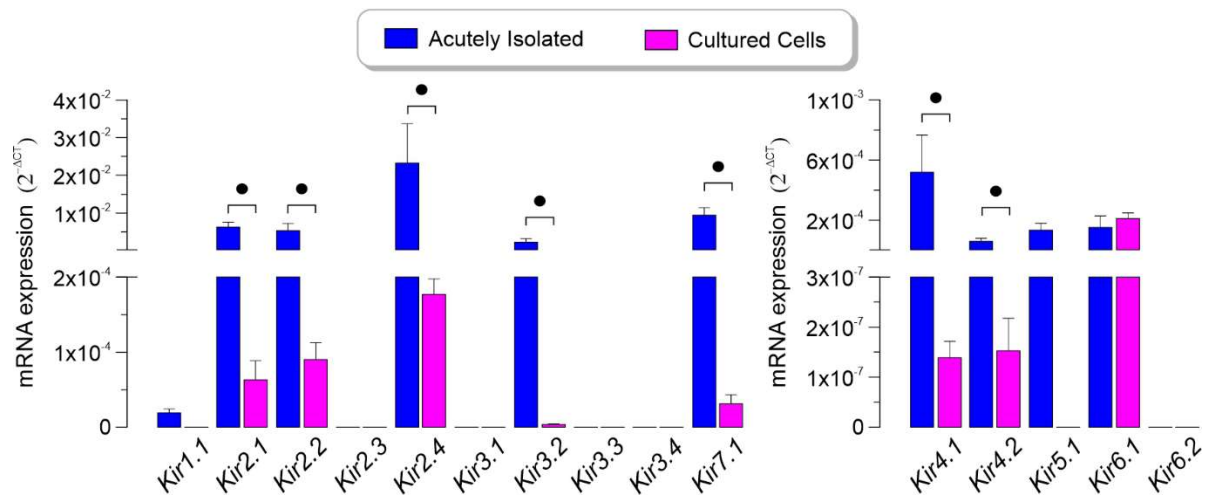

**Supplemental Figure S1. Kir channel mRNA expression levels in acutely isolated and cultured human RPE cells.** The expression levels were calculated using the formula  $2^{-\Delta CT}$ , with  $\Delta CT = CT_{\text{channel}} - CT_{\text{ACTB}}$ . Cells derived from 4 (cultured cells) to 6 eyes (acutely isolated cells) of different donors were used. Significant difference between acutely isolated and cultured cells: •  $P < 0.05$ .
